# Supplementary material for: Cell proliferation fate mapping reveals regional cardiomyocyte cell-cycle activity in subendocardial muscle of left ventricle
Source: PubMed Central journal article supplement (PMC8486850; doi:10.1038/s41467-021-25933-5), 2021-10-01
Supplement: 41467_2021_25933_MOESM1_ESM.pdf [file 41467_2021_25933_MOESM1_ESM.pdf]

## **Supplementary Material for**

Cell proliferation fate mapping reveals regional cardiomyocyte cell-cycle activity in subendocardial muscle of left ventricle

Xiuxiu Liu, Wenjuan Pu, Lingjuan He, Yan Li, Huan Zhao, Yi Li, Kuo Liu, Xiuzhen Huang, Wendong Weng, Qing-Dong Wang, Linghong Shen, Reza Ardehali, Ben He, Bin Zhou

**Supplementary Figure 1 to 8**

**Supplementary table 1**

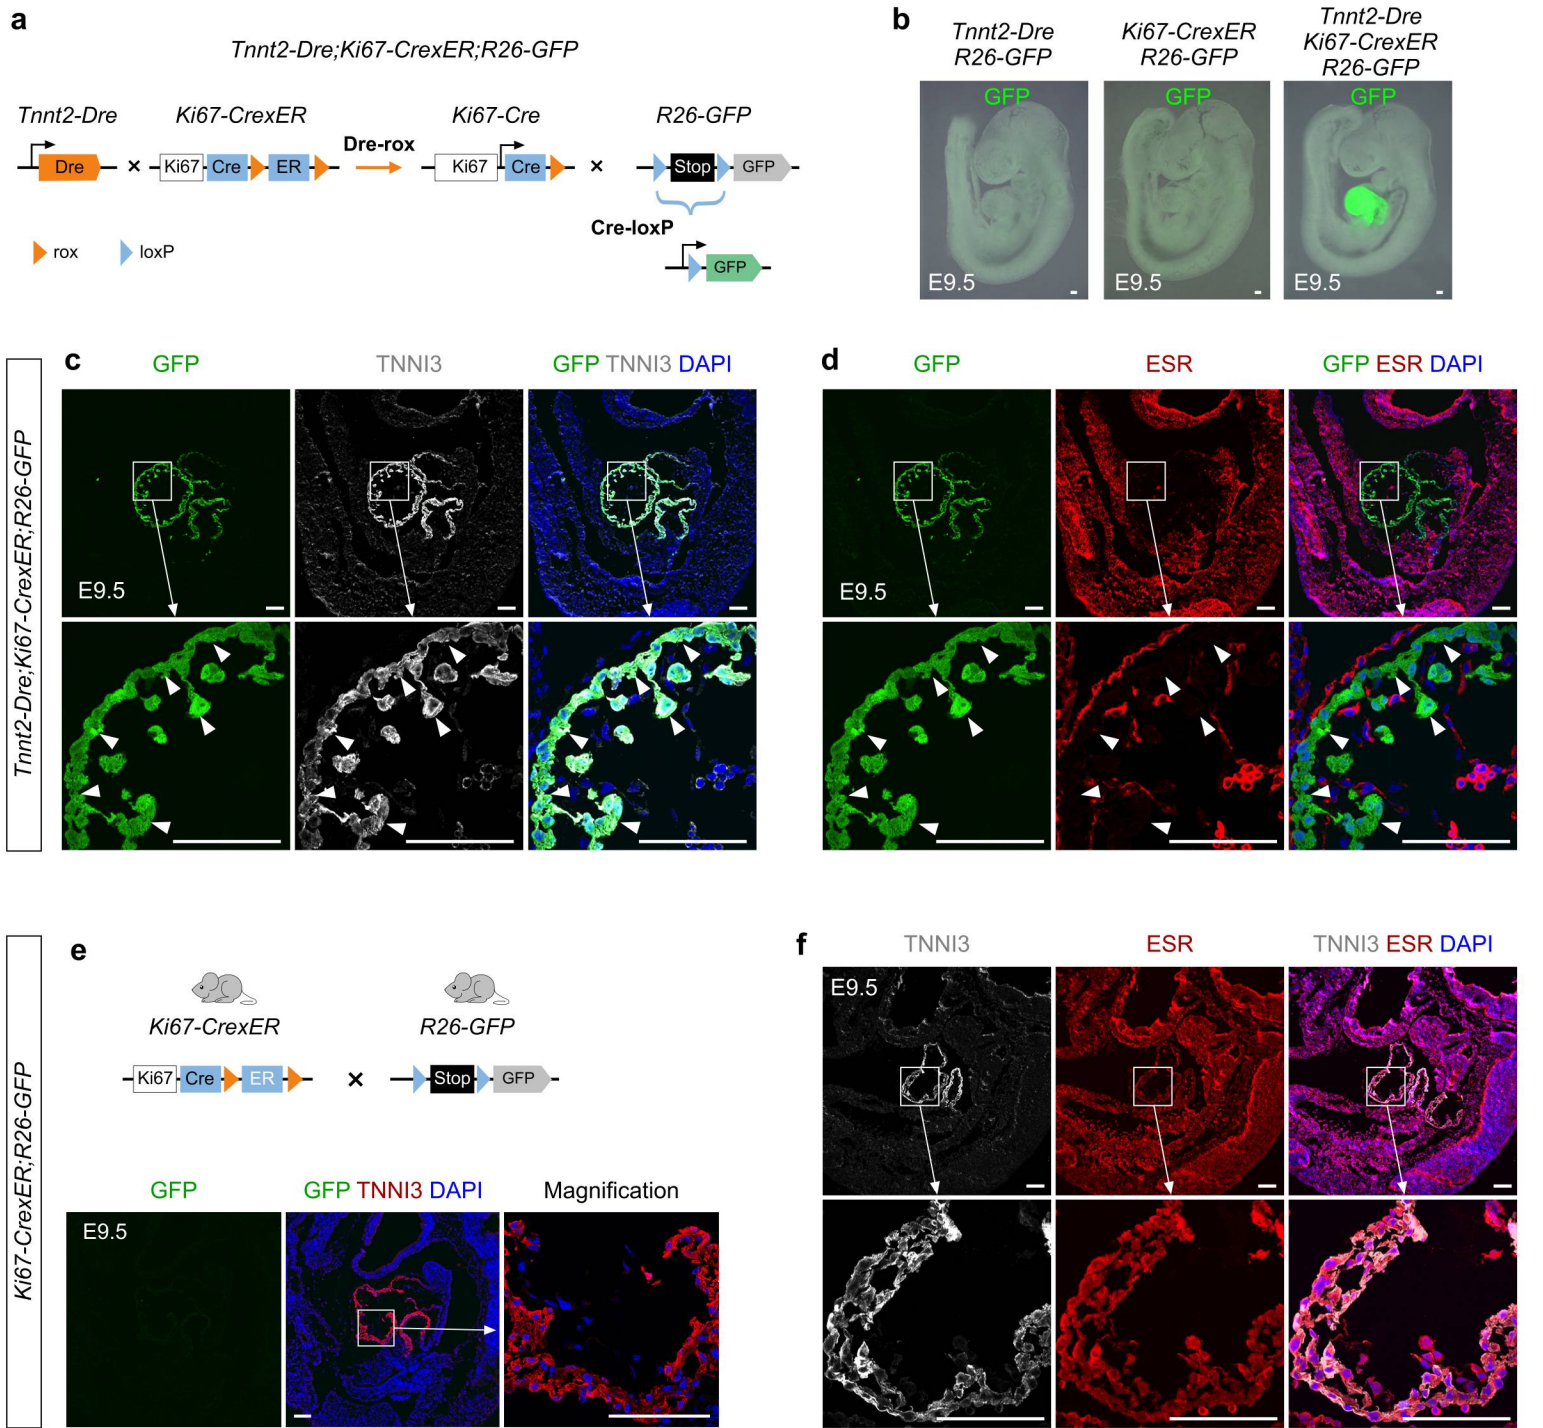

**Supplementary Fig. 1. Characterization of *Ki67-CrexER* line by *Dre-rox* recombination.**

**a** Schematic showing strategy for *Tnnt2-Dre* primed ProTracer system. **b** Whole-mount fluorescence images of E9.5 *Tnnt2-Dre;R26-GFP*, *Ki67-CrexER;R26-GFP*, or *Tnnt2-Dre;Ki67-CrexER;R26-GFP* embryos. **c**, **d** Immunostaining for GFP and TNNI3 (**c**) or ESR (**d**) on same section of E9.5 *Tnnt2-Dre;Ki67-CrexER;R26-GFP* embryo shows ER is not detectable after its excision in GFP<sup>+</sup>TNNI3<sup>+</sup> cardiomyocytes (arrowheads). **e**, **f** Immunostaining for TNNI3 and GFP (**e**) or ESR (**f**) on E9.5 *Ki67-CrexER;R26-GFP* embryonic sections shows that, while there is no *Tnnt2-Dre* allele, ER is maintained in cardiomyocytes. Scale bars: 100  $\mu$ m. Each image is representative of 5 individual biological samples.

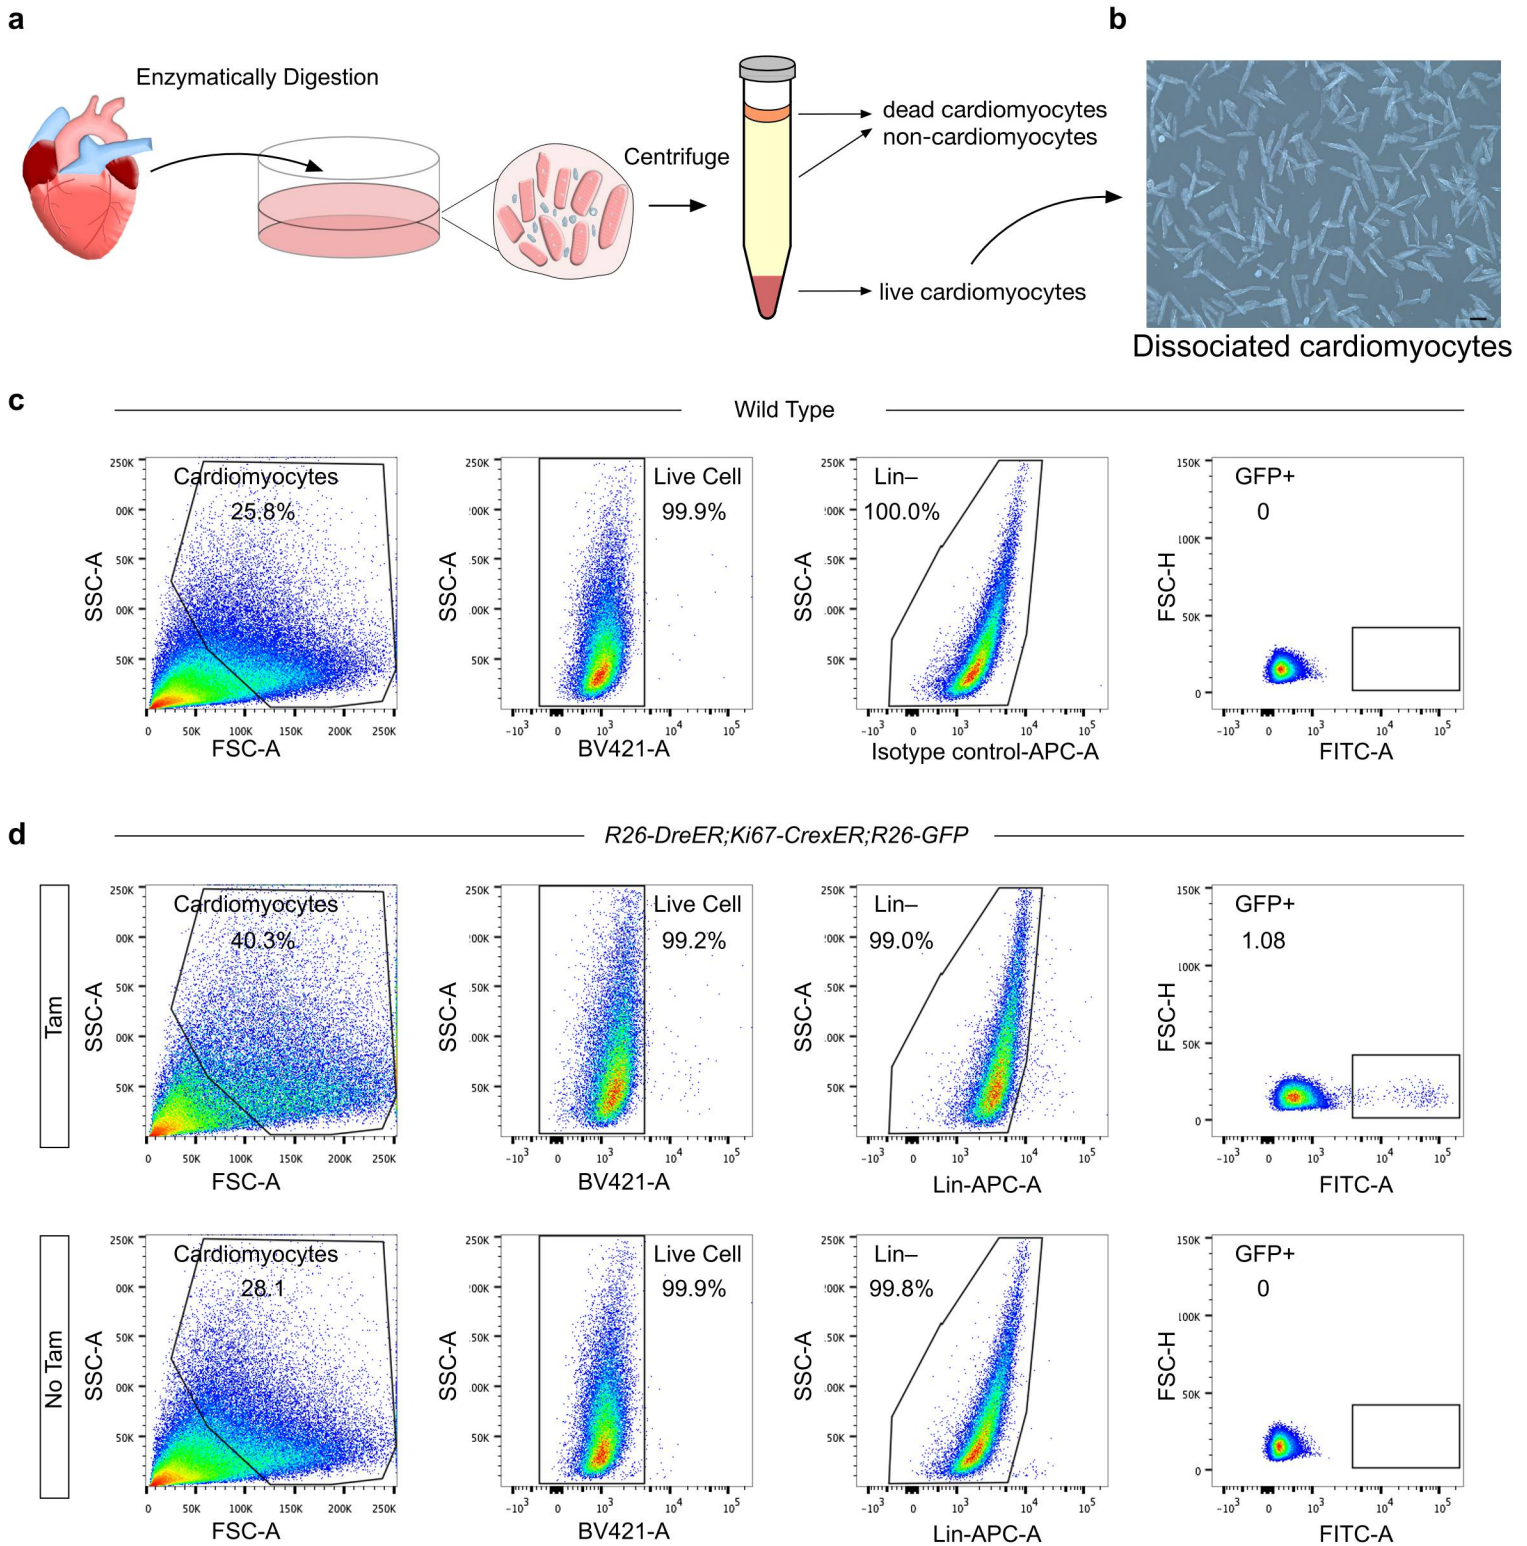

**Supplementary Fig. 2. FACS gates for GFP+ cardiomyocytes in *R26-DreER;Ki67-CrexER;R26-GFP* mice.**

**a** Schematic figure showing cardiomyocytes were enzymatically dispersed from hearts followed by centrifugation (see methods). **b** Image showing dissociated cells used for FACS analysis were cardiomyocytes. scale bars, 100  $\mu$ m. The image is representative of 5 individual biological samples. **c** Successive gating shows sequential selection of cardiomyocytes by forward scatter (FSC) and side scatter (SSC). LIVE/DEAD Fixable Violet Dead Cell staining (BV421-A) was used to identify live cells. Cardiomyocytes of wild type mice were stained with isotype control antibodies as a control for staining of lineage-specific antibodies. **d** Same gating strategy was applied to cardiomyocytes of *R26-DreER;Ki67-CrexER;R26-GFP* mice with or without Tam treatment. Cardiomyocytes were stained with lineage-specific (Lin) antibodies against endothelial cells (CD31-APC), fibroblasts (CD140a-APC) and hematopoietic cells (CD45-APC) to allow exclusion of these cells. Lineage negative cells were gated for subsequent analysis. The FITC-A panels shown here correspond to Fig. 1e FITC-A panels.



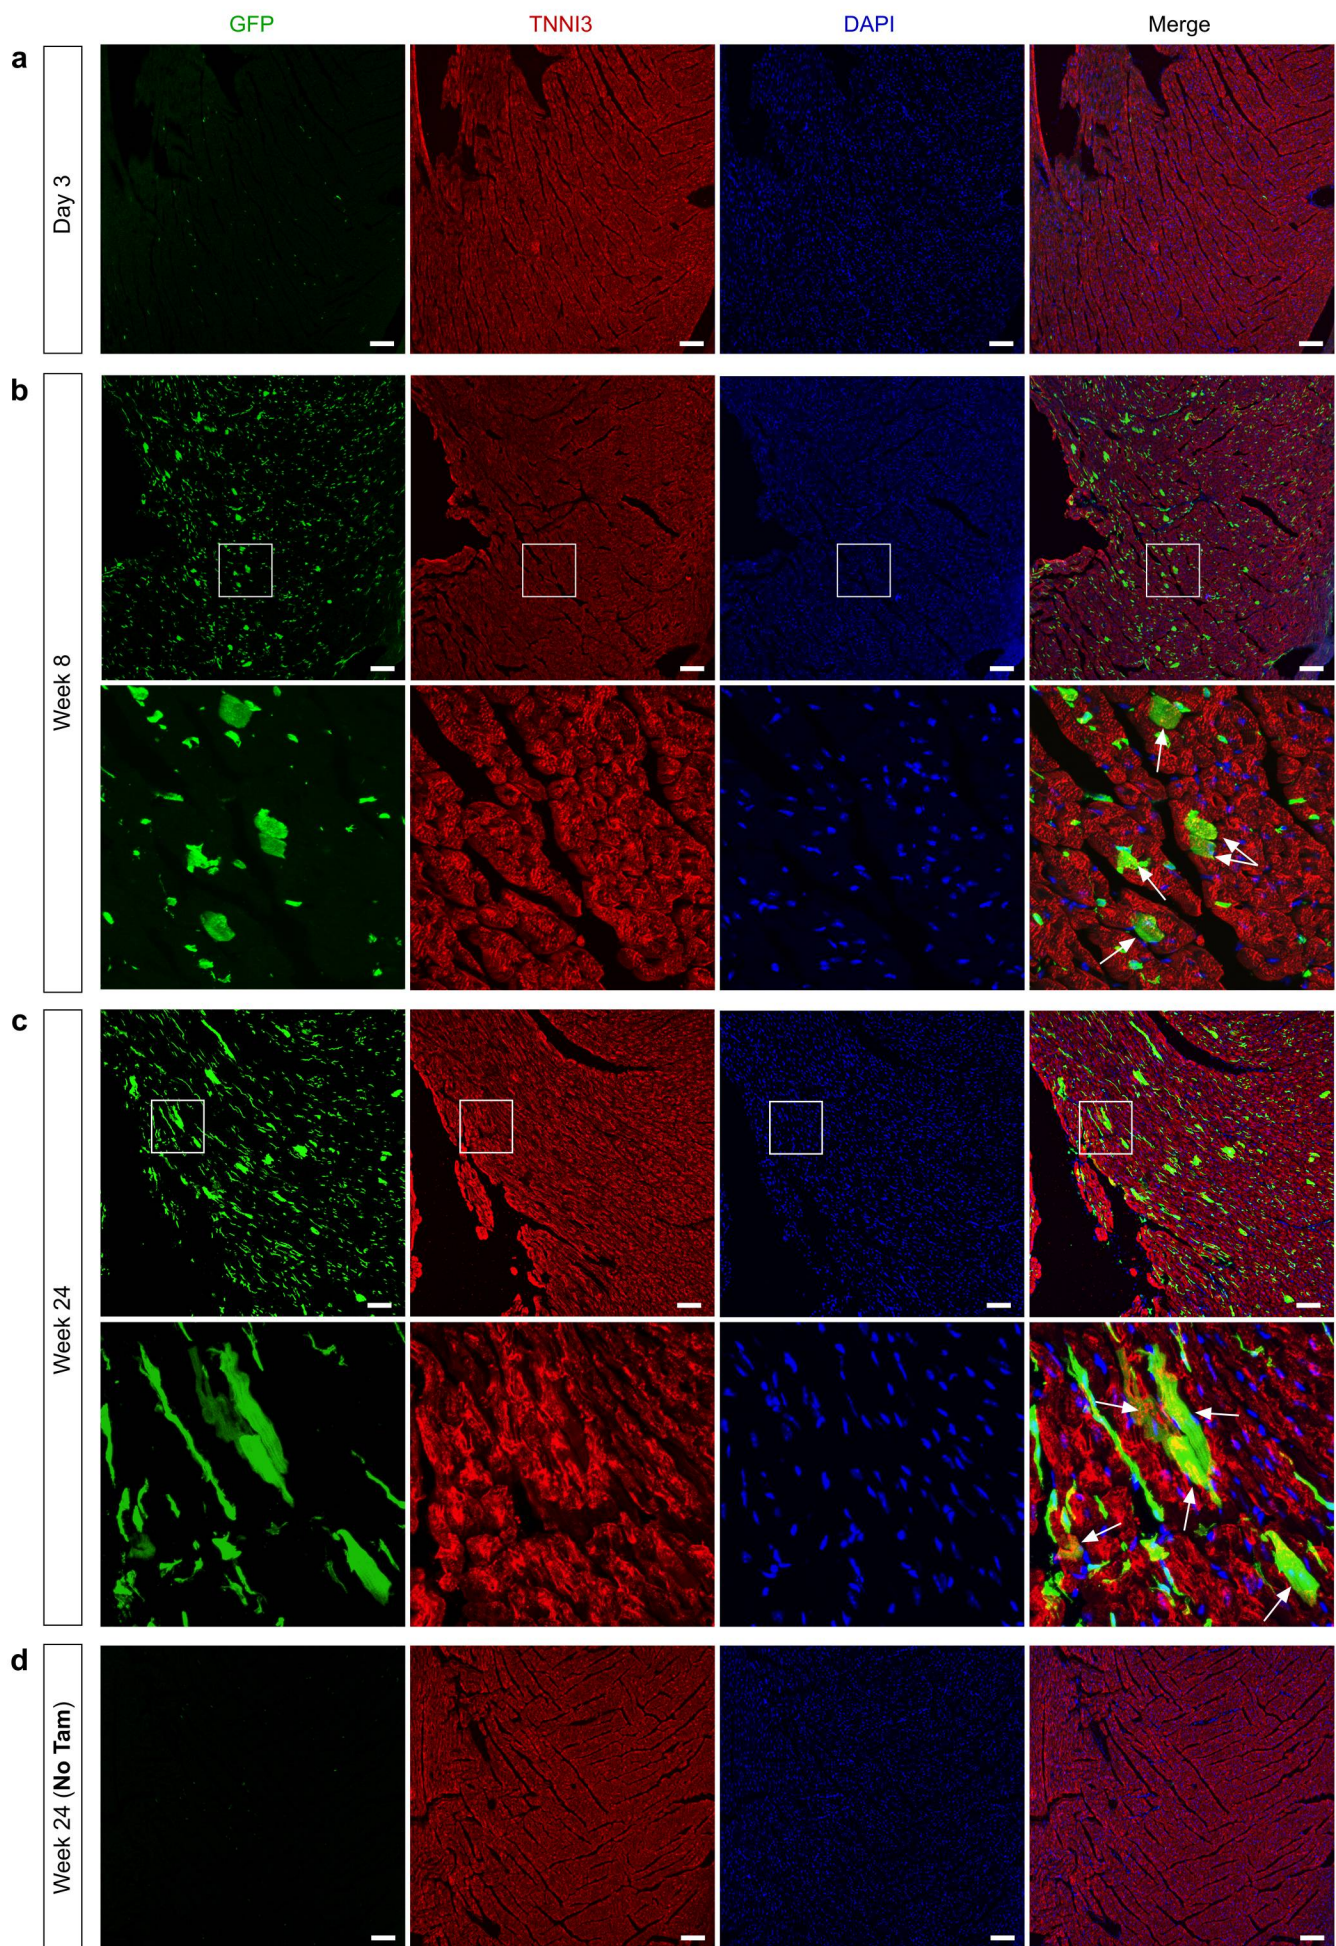

**Supplementary Fig. 3. Ki67<sup>+</sup> cells recorded by ProTracer in adult hearts.**

**a-d** Immunostaining for GFP and TNNI3 on heart sections collected from *R26-DreER;Ki67-CrexER;R26-GFP* mice at Day 3 (**a**), Week 8 (**b**), and Week 24 (**c**) after tamoxifen treatment; or Week 24 after corn oil treatment (No Tam, **d**). Arrows, GFP<sup>+</sup> cardiomyocytes. Scale bars: 100  $\mu$ m. Each image is representative of 5 individual biological samples.



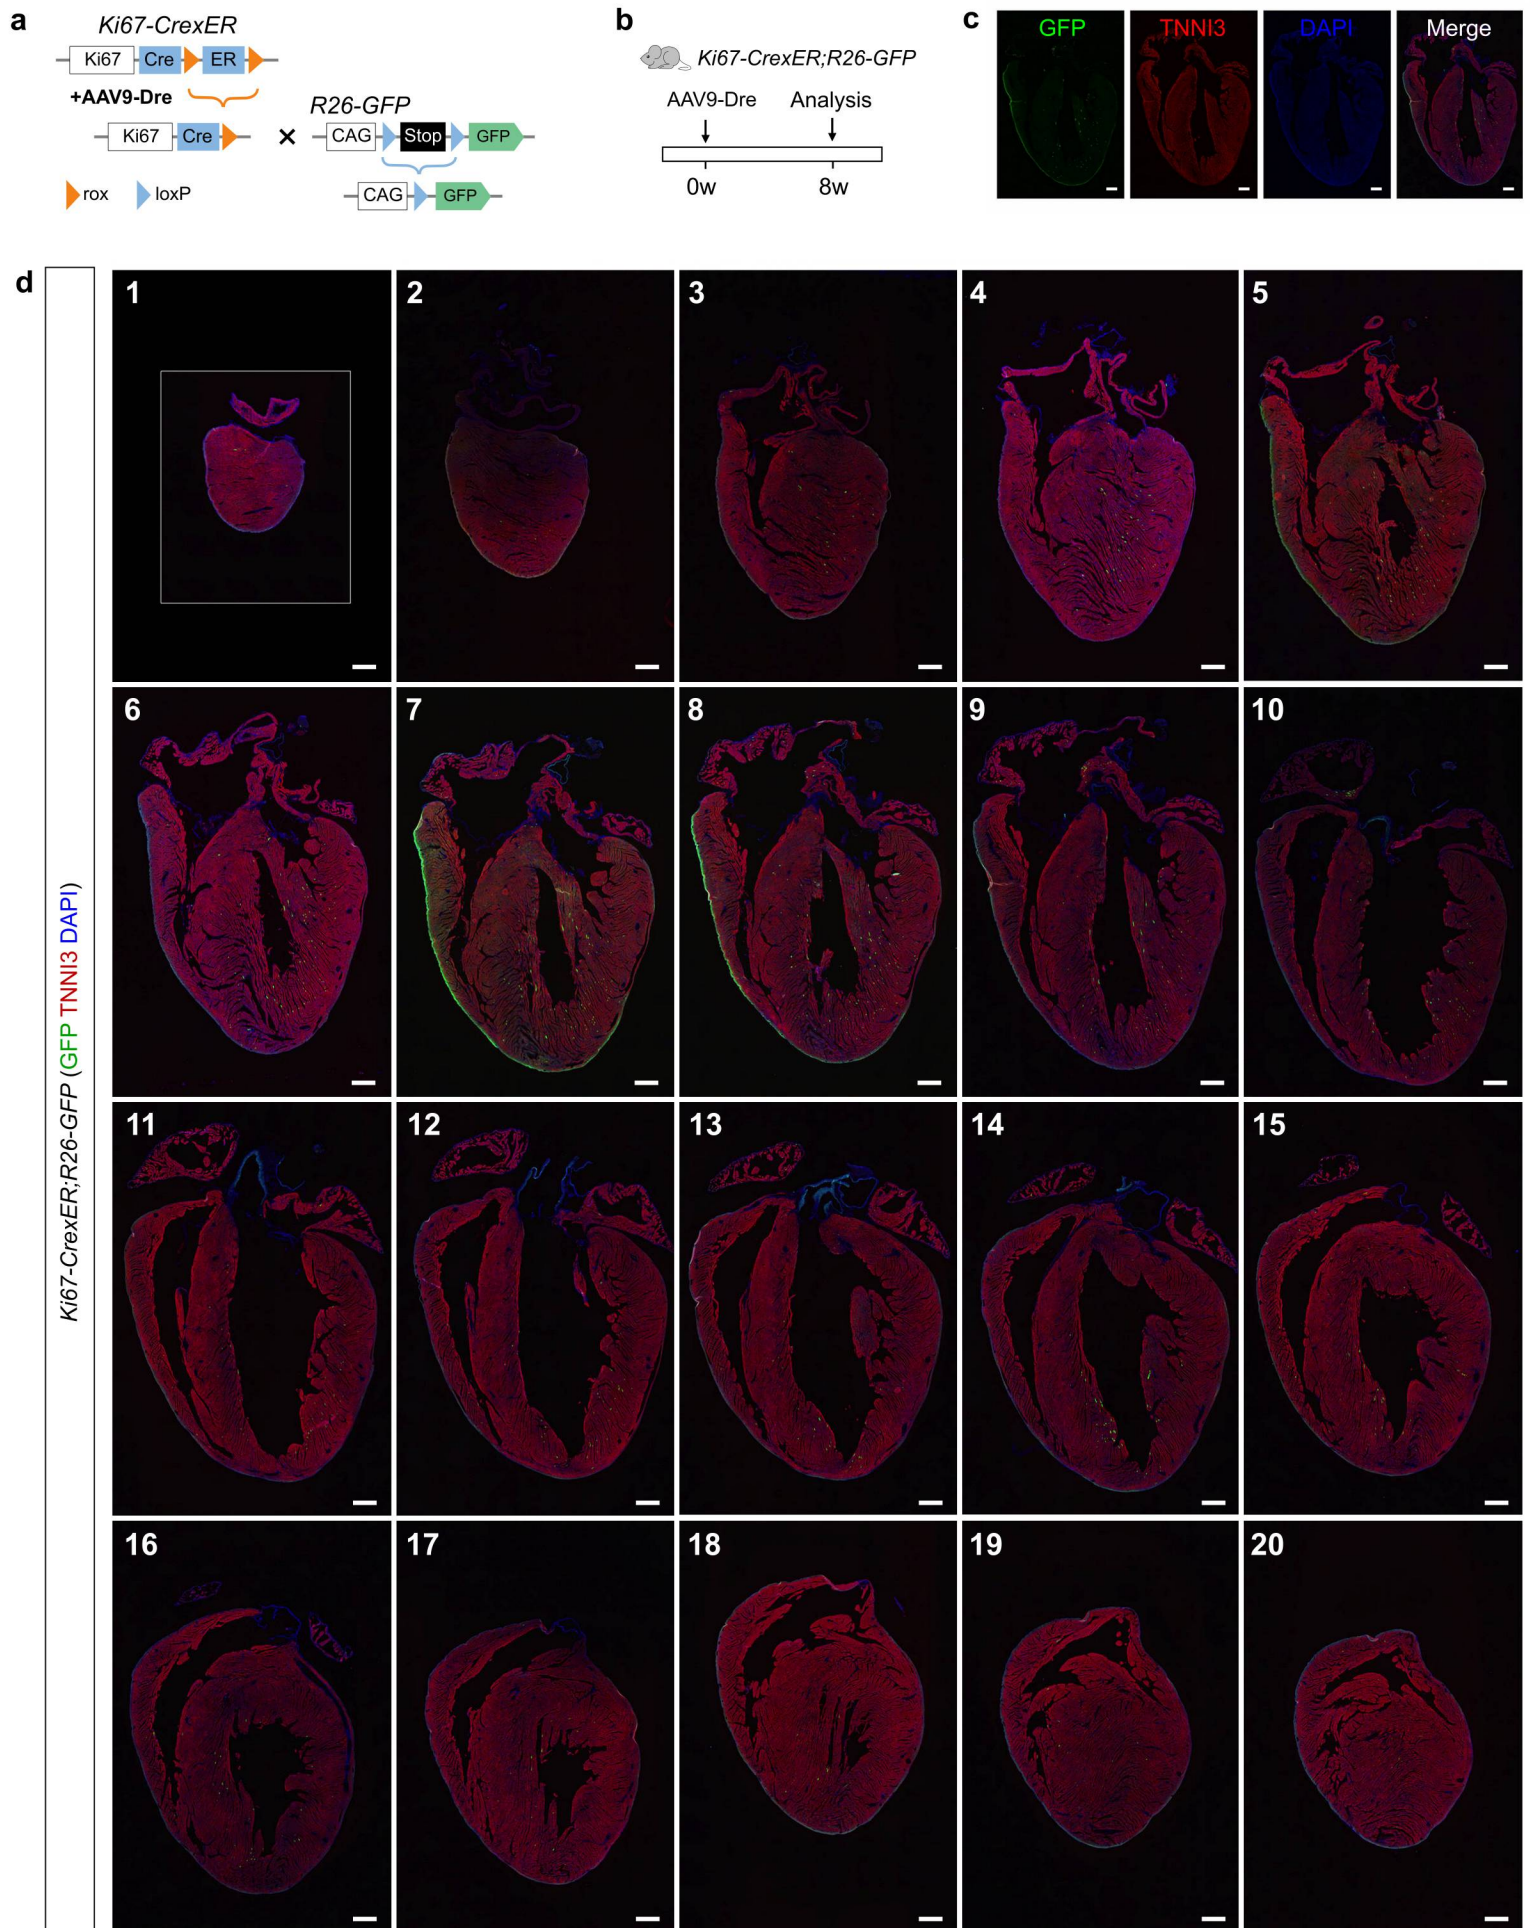

**Supplementary Fig. 4. Cardiomyocyte cell-cycle activity recorded by *Ki67-CrexER;R26-GFP* hearts in series of sections.**

**a** Schematic showing tracing strategy of cardiomyocyte-specific ProTracer. **b** Schematic showing experimental design. **c** Immunostaining for GFP and TNNI3 on heart sections with split channels. **d** Merged images of immunostained sections collected from *Ki67-CrexER;R26-GFP* hearts (1-20: from dorsal to ventral side). Scale bars: 500  $\mu$ m. Each figure is representative of 5 individual biological samples.



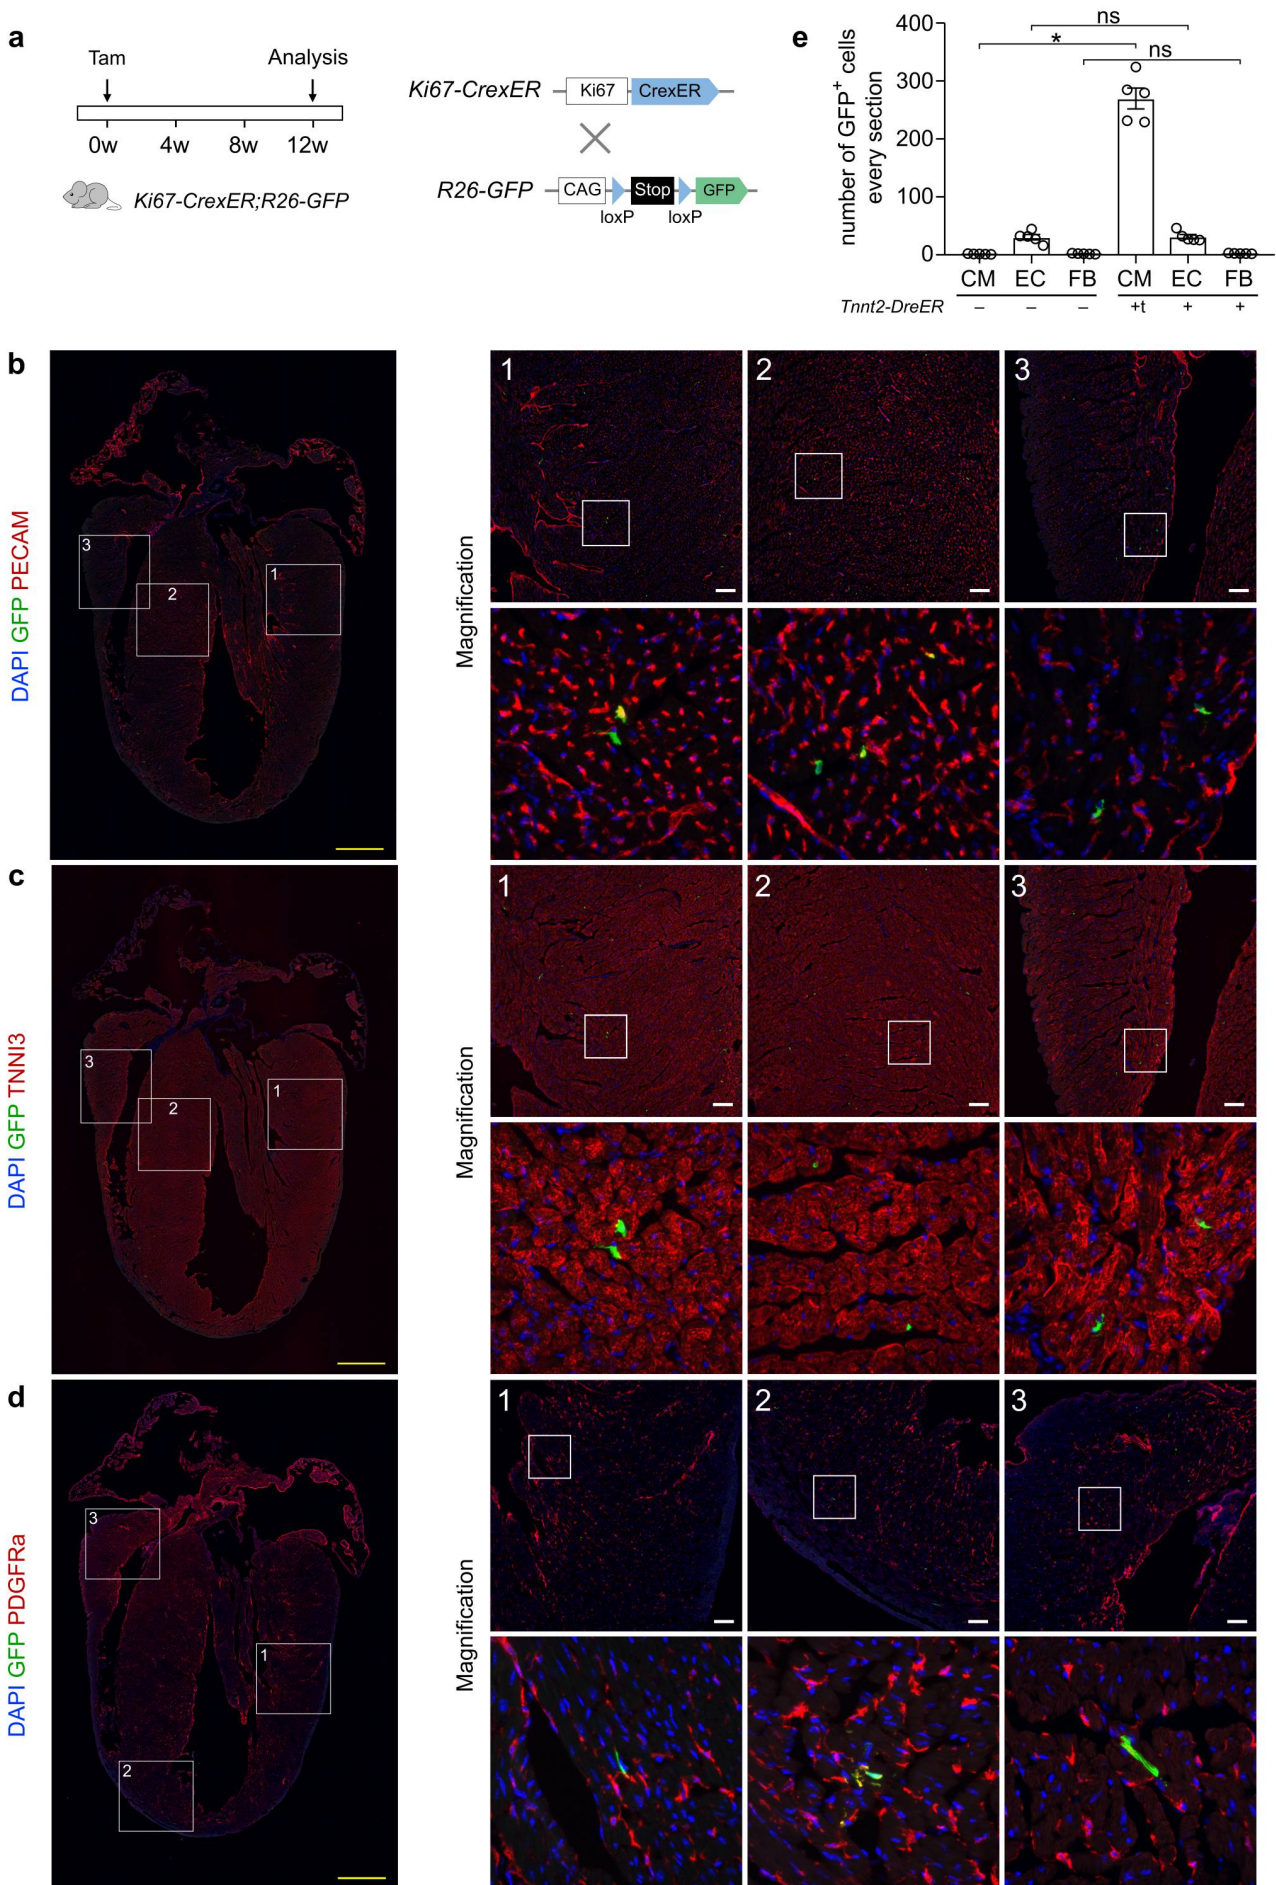

**Supplementary Fig. 5. Examination of cell labeling by *Ki67-CrexER*;*R26-GFP* in adult hearts.**

**a** Schematic figure showing experimental strategy using *Ki67-CrexER*;*R26-GFP* mice. **b-d** Immunostaining for GFP and PECAM (**b**), TNNI3 (**c**), and PDGFR $\alpha$  (**d**) on heart sections at Week 12 after tamoxifen treatment shows very few PECAM $^+$  endothelial cells or PDGFR $\alpha^+$  fibroblasts expressing GFP, and almost no detectable GFP $^+$  cardiomyocytes. **e** Quantification of the number of different kinds of GFP $^+$  cells every heart section in *Ki67-CrexER*;*R26-GFP* or *Tnnt2-DreER*;*Ki67-CrexER*;*R26-GFP* mice. Data are the mean  $\pm$  s.e.m.;  $n = 5$ . Data were analysed by two-tailed un-paired Student t-test,  $*P < 0.0001$ ,  $P = 0.8868$ ,  $P = 0.2459$  (CM, EC, FB); ns, non-significant. CM, cardiomyocytes; EC, endothelial cells; FB, fibroblasts. Scale bars, yellow, 1 mm; white, 100  $\mu$ m. Each figure is representative of 5 individual biological samples.



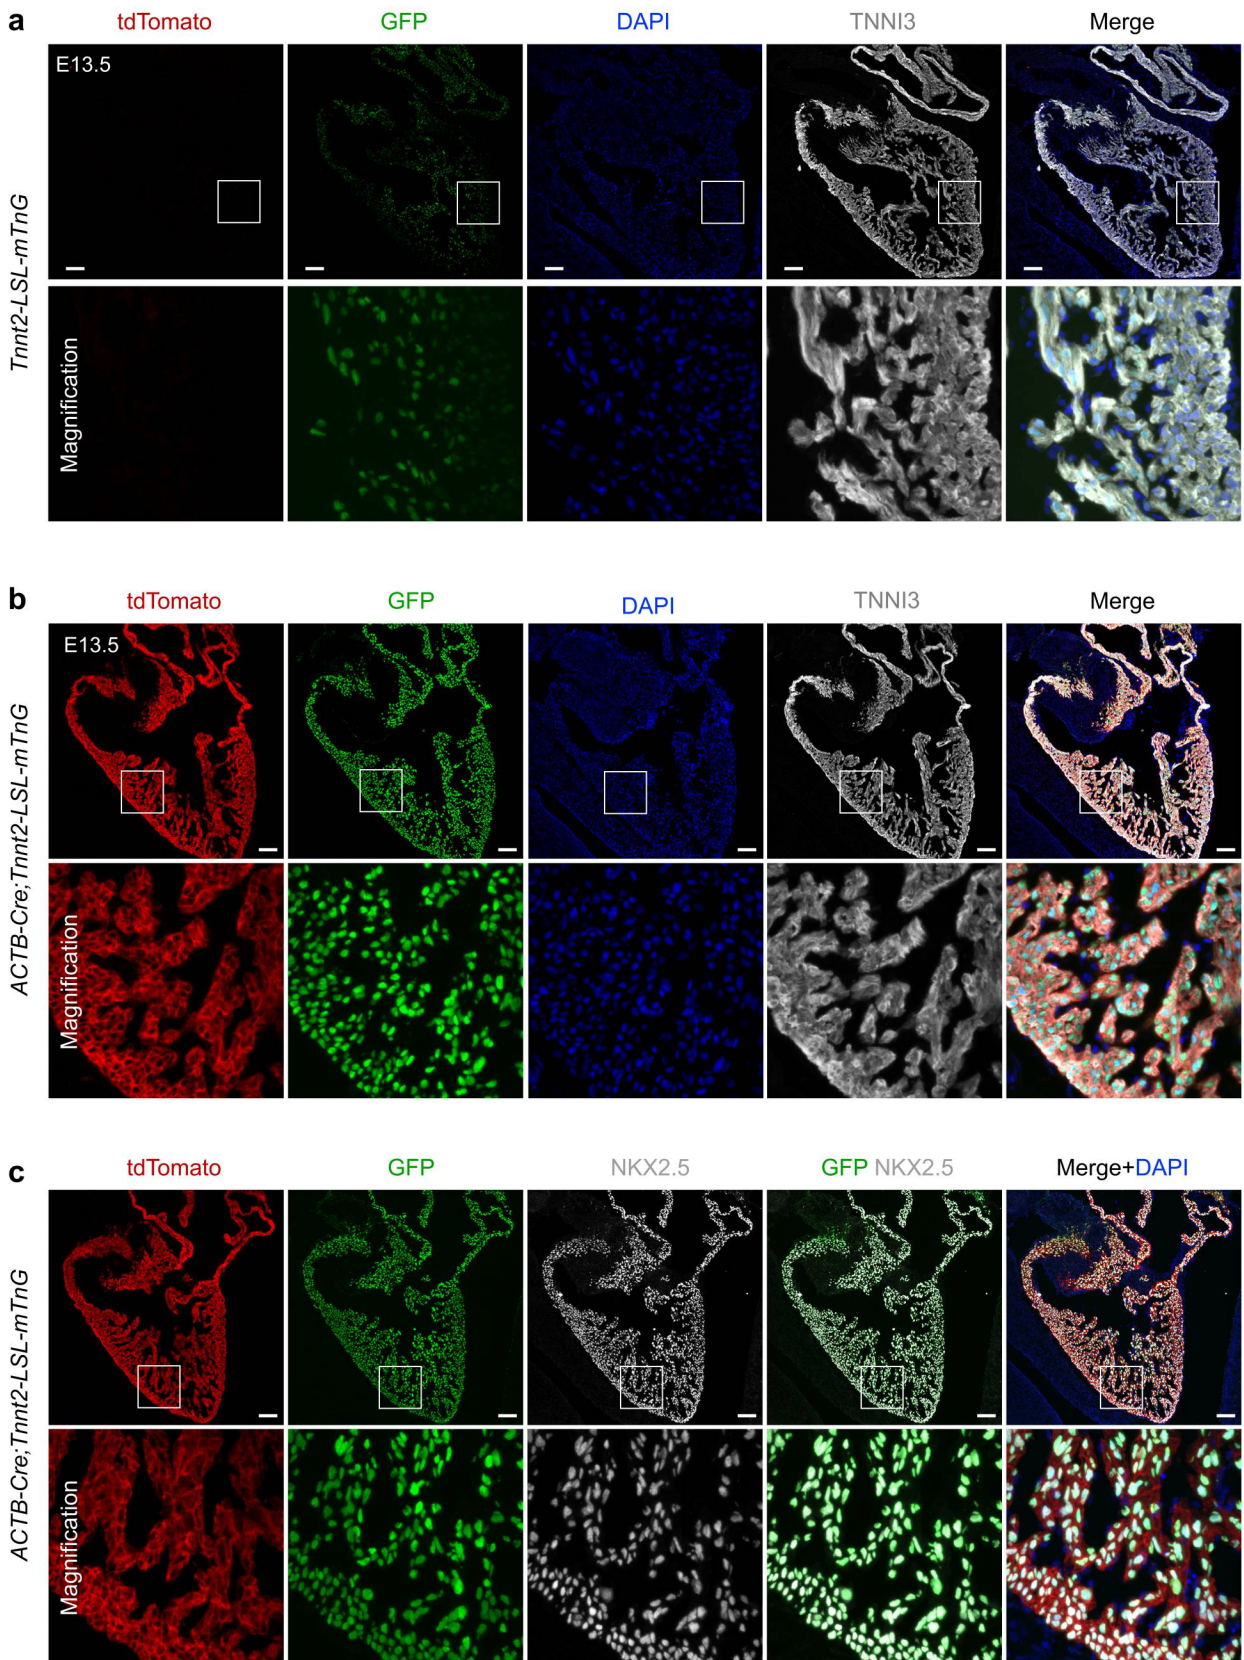

**Supplementary Fig. 6. Generation and characterization of *Tnnt2-LSL-mTnG* line.**

**a** Immunostaining for tdTomato, GFP, and TNNI3 on E13.5 *Tnnt2-LSL-mTnG* heart sections. Weak nGFP but not tdTomato signal is detected in TNNI3<sup>+</sup> CMs. **b-c** Immunostaining for tdTomato, GFP and TNNI3 (**b**) or NKX2.5 (**c**) on heart sections from E13.5 *ACTB-Cre;Tnnt2-LSL-mTnG* embryos. Robust nGFP and tdTomato signals are detected specifically in TNNI3<sup>+</sup> or NKX2.5<sup>+</sup> CMs. Scale bars, 100  $\mu$ m. Each image is representative of 5 individual biological samples.



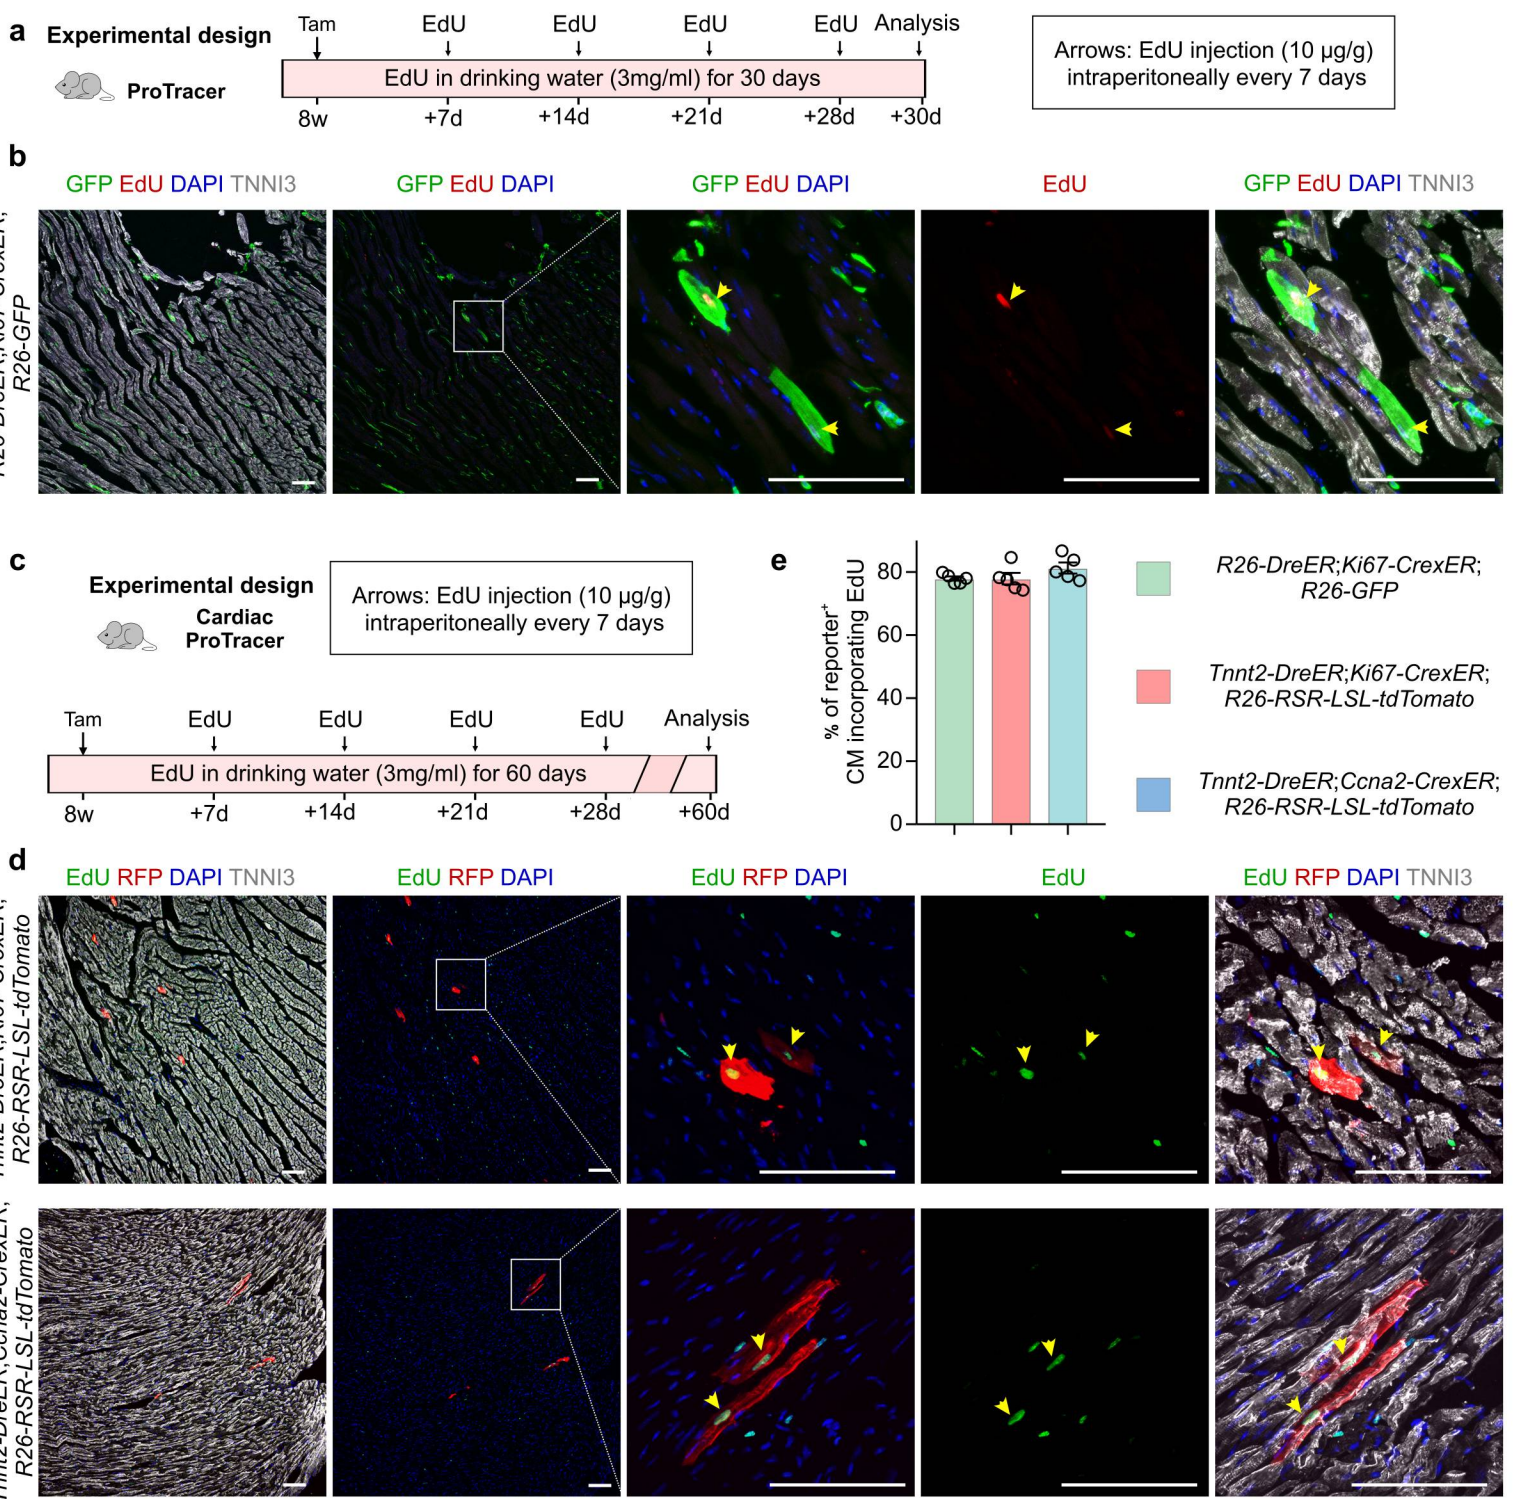

**Supplementary Fig. 7. Examination of EdU incorporation in hearts of ProTracer mice**

**a** Schematic figure showing experimental design of EdU incorporation on ProTracer mice. **b** Heart sections collected from EdU and tamoxifen treated *R26-DreER;Ki67-CrexER;R26-GFP* mice were stained with GFP, EdU, and TNNI3. Arrow heads, EdU<sup>+</sup>GFP<sup>+</sup> cardiomyocytes. **c** Schematic showing strategy for EdU incorporation on cardiomyocyte specific ProTracer (Cardiac ProTracer). **d** Heart sections collected from EdU and tamoxifen treated *Tnnt2-DreER;Ki67-CrexER;R26-RSR-LSL-tdTomato* or *Tnnt2-DreER;Ccna2-CrexER;R26-RSR-LSL-tdTomato* mice were stained with EdU, RFP, and TNNI3. Arrow heads, EdU<sup>+</sup>RFP<sup>+</sup> cardiomyocytes. **e** Quantification of percentage of reporter<sup>+</sup> cardiomyocytes incorporating EdU. Data are the mean ± s.e.m.; n = 5. Scale bars, 100 µm. Each image is representative of 5 individual biological samples.



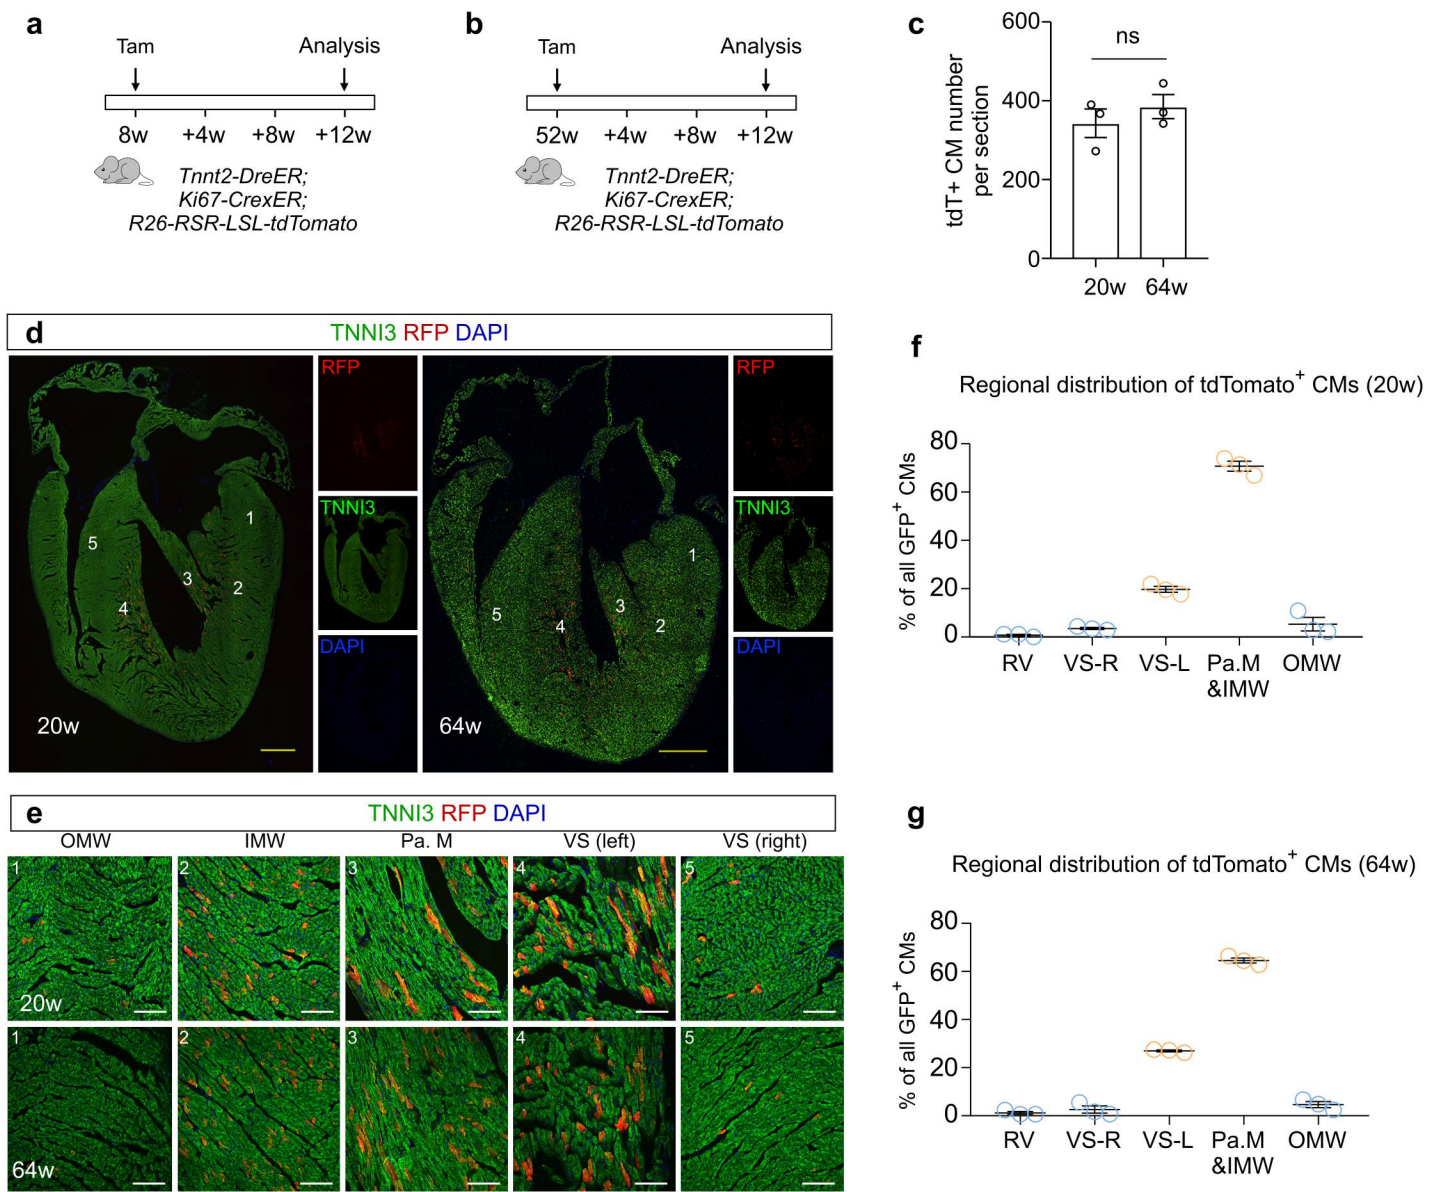

### Supplementary Fig. 8. Cycling cardiomyocytes at old age

**a-b** Schematic figure showing experimental strategy using *Tnnt2-DreER;Ki67-CrexER;R26-RSR-LSL-tdTomato*. **c** Quantification of the number of tdTomato<sup>+</sup> cardiomyocytes per heart section collected from *Tnnt2-DreER;Ki67-CrexER;R26-RSR-LSL-tdTomato* mice which were treated with tamoxifen at different time points. Data are the mean  $\pm$  s.e.m.;  $n = 3$ . Data were analysed by two-tailed un-paired t-test.  $P = 0.42$ , ns, non-significant. **d** Immunostaining for TNNI3 and RFP on heart sections collected from *Tnnt2-DreER;Ki67-CrexER;R26-RSR-LSL-tdTomato* mice treated with tamoxifen at indicated time points. **e** Magnified views of heart sections in (d). **f-g** Quantification of the distribution of tdTomato<sup>+</sup> CMs in different regions of the ventricles. Data are the mean  $\pm$  s.e.m.;  $n = 3$ . Scale bars, yellow, 1mm; white, 100  $\mu$ m. Each image is representative of 3 individual biological samples.



Supplementary table1: Genomic PCR primer list and Southern Blotting probe sequence

Genomic PCR primer list

| Mouse line                                          |            |                             |
|-----------------------------------------------------|------------|-----------------------------|
| <i>R26-DreER</i><br>M: 143bp<br>W: 364bp            | M, forward | CGTGCTGGTTATTGTGCTGTCTC     |
|                                                     | M, reverse | TACTCCTTGCCGATGTTCCCTCAGG   |
|                                                     | W, forward | TTGGAGGCAGGAAGCACTTG        |
|                                                     | W, reverse | CCGACAAAACCGAAAATCTGTG      |
| <i>R26-GFP</i><br>M: 622bp<br>W: 297bp              | M, forward | AAGGGAGCTGCAGTGGAGTA        |
|                                                     | M, reverse | CCGAAAATCTGTGGGAAGTC        |
|                                                     | W, forward | CAGCGACTTCTTCATCCAGAGC      |
|                                                     | W, reverse | AAAGCAGCGTATCCACATAGCG      |
| <i>Tnnt2-DreER</i><br>M, 439bp<br>W, 773bp          | forward    | TCCGTGCCAGAATGAAAATGTC      |
|                                                     | M, reverse | ACTCCTTGCCGATGTTCCCTCAG     |
|                                                     | W, reverse | TGTGGGGTGACTTGAGACCTAAGG    |
| <i>Tnnt2-Dre</i><br>M, 323bp<br>W, 422bp            | forward    | GCTGCCTTGCTGTGTTGTTTCAG     |
|                                                     | M, reverse | ACTCCTTGCCGATGTTCCCTCAG     |
|                                                     | W, reverse | TGTGTATTCCCAAAGTCCCCAG      |
| <i>R26-rox-tdTomato</i><br>M, 609bp<br>W, 297bp     | M, forward | ACGGGTGTTGGGTCGTTTGTTTC     |
|                                                     | M, reverse | TTCTTGTAATCGGGGATGTCGGCG    |
|                                                     | W, forward | AAGGGAGCTGCAGTGGAGTA        |
|                                                     | W, reverse | CCGAAAATCTGTGGGAAGTC        |
| <i>R26-RSR-LSL-tdTomato</i><br>M, 404bp<br>W, 297bp | M, forward | ACGGGTGTTGGGTCGTTTGTTTC     |
|                                                     | M, reverse | ATGTTTCAGGTTCAAGGGGAGGTG    |
|                                                     | W, forward | AAGGGAGCTGCAGTGGAGTA        |
|                                                     | W, reverse | CCGAAAATCTGTGGGAAGTC        |
| <i>ACTB-Cre</i><br>M, 391bp<br>W, 200bp             | M, forward | CCTGGAAAATGCTTCTGTCCG       |
|                                                     | M, reverse | CAGGGTGTTATAAGCAATCCC       |
|                                                     | W, forward | GTATTGAATTGAAGCACCTTTGTTTGG |
| <i>Ki67-CrexER</i><br>M, 312bp<br>W, 475bp          | reverse    | TTGGCGTCTGAAGAGAGTATGACC    |
|                                                     | M, forward | GGGCTCTACTTCATCGCATTCC      |
|                                                     | W, forward | ATCTGGTCCCTGGATGGTTG        |
| <i>Ccna2-CrexER</i><br>M, 677bp<br>W, 726bp         | reverse    | TGTAACATCTGAGAGCCGAATGAG    |
|                                                     | M, forward | GGGCTCTACTTCATCGCATTCC      |
|                                                     | W, forward | TGGTAAGAGAAGGGTAAGGGGG      |
| <i>Tnnt2-LSL-mTnG</i><br>M, 214bp<br>W, 477bp       | M, forward | TCCACAACGAGGACTACACCATC     |
|                                                     | M, reverse | CCTTCTTGAGCCCTTTTTCG        |
|                                                     | W, forward | CACACAGTGGAGTCACACAATGG     |
|                                                     | W, reverse | ATTATTTCTGAGGTCTCGGGGG      |

M, mutant allele; W, wild type allele.

Southern Blotting probe sequence

ACGTATAGCCGAAATTGCCAGGATCAGGGTTAAAGATATCTCACGTA CTGACGG  
TGGGAGAATGTTAATCCATATTGGCAGAACGAAAACGCTGGTTAGCACC GCAGG  
TG TAGAGAAGGCACTTAGCCTGGGGGTA ACTAACTGGTCGAGCGATGGATTTC  
CGTCTCTGGTGTAGCTGATGATCCGAATAACTACCTGTTTTGCCGGGTCAGAAAA



AATGGTGTTGCCGCGCCATCTGCCACCAGCCAGCTATCAACTCGCGCCCTGGAAG  
GGATTTTGAAGCAACTCATCGATTGATTTACGGCGCTAAGGATGACTCTG
